# Supplementary material for: Rational selection of superparamagnetic iron oxide/silica nanoparticles to create nanocomposite inductors
Source: Royal Society of Chemistry journal article supplement (doi:10.1039/c5tc00915d), 2015-01-01
Supplement: c5tc00915d1.pdf [file c5tc00915d1.pdf]

## Supporting Information

Rational Design, Fabrication and Performance of Monolithic Superparamagnetic Iron

Oxide/Silica Nanocomposite Inductors

Michael P. Rowe,\* Sean Sullivan, Ryan D. Desautels, Elizabeth Skoropata, and Johan van Lierop\*

### Experimental Section

#### *Sample Synthesis and Preparation*

The core/shell iron-oxide/silica nanoparticles were synthesized by ammonium hydroxide-driven oxygen substitution onto iron chloride salts followed by a modified Stober process to deposit the silica shells.  $\text{FeCl}_3 \cdot 6\text{H}_2\text{O}$  (4.44 g) and  $\text{FeCl}_2 \cdot 4\text{H}_2\text{O}$  (1.65 g) were dissolved in  $\text{H}_2\text{O}$  (190 mL). Ammonium hydroxide (~28%, 10 mL) was then added dropwise to the vigorously stirred reaction. The product was collected and washed with 2M nitric acid, and then  $\text{H}_2\text{O}$ . The nanoparticles were next dispersed in  $\text{H}_2\text{O}$  (200 mL), and the pH was raised to 7 using additional ammonium hydroxide. Triethylamine (5.5 mL) was introduced to the suspension and allowed to fully mix. Tetraethyl orthosilicate (TEOS) (see Table 1 for TEOS versus silica shell thickness data) in ethanol (123 mL) was added to this nanoparticle suspension, and stirred for 15 minutes. The silica-coated iron-oxide nanoparticles were precipitated from solution by lowering the pH to between 7 and 8 using 2M nitric acid. The precipitated core/shell nanoparticle product was collected and washed with ethanol. The dried nanoparticles were finally consolidated using a hot press (Thermal Technologies) at 415 °C and 80 MPa for 20 minutes under an argon atmosphere.

#### *Measurement and Characterization*

Analysis was conducted on the nanoparticle powder and sintered monolithic nanocomposite using SEM-EDS (HD2000, Hitachi), TEM (H7600T, Hitachi), XRD (Brüker D8 Da-Vinci), and SQUID magnetometry and susceptometry (Quantum Design MPMS XL5). Magnetometry experiments were done on samples that were 50 kOe field-cooled from 400 K to 10 K before hysteresis loops were collected. Transmission Mössbauer spectra were collected at 10 K using a Janis SHI-850 closed cycle refrigeration system and a WissEl constant acceleration spectrometer with a 10 GBq  $^{57}\text{CoRh}$  source. The source drive velocity was calibrated using a 6  $\mu\text{m}$  thick  $\alpha\text{-Fe}$  foil at room temperature. Q factors were calculated using the following equation:

$$Q \text{ Factor} = \frac{2\pi(\text{Frequency})(\text{Inductance})}{(\text{Resistance})}$$

**Table S1)** Correlation between volume of TEOS used during synthesis for the silica shells and the resulting shell thickness determined from transmission electron microscopy (TEM) images.

| TEOS used in synthesis (mL) | Nanoparticle's silica shell thickness (nm) |
|-----------------------------|--------------------------------------------|
| 1.4                         | $3.6 \pm 1.4$                              |
| 2.8                         | $4.6 \pm 1.8$                              |
| 4.2                         | $5.2 \pm 2.5$                              |

**Table S2)** Results of fits to the AC susceptibility data for the nanoparticles to the Vogel-Fulcher law (as described in the text).  $\nu_0 = 1 - 3 \times 10^{12}$  Hz.

| TEM measurement of nanoparticle system |                                       | AC susceptibility data     |              |
|----------------------------------------|---------------------------------------|----------------------------|--------------|
| Fe-oxide core diameter (nm)            | SiO <sub>2</sub> shell thickness (nm) | $K$ (erg/cm <sup>3</sup> ) | $T_0$ (K)    |
| 4.6                                    | 3.6                                   | $4.3 \pm 0.3 \times 10^6$  | $153 \pm 13$ |

|     |     |                           |              |
|-----|-----|---------------------------|--------------|
| 4.9 | 4.6 | $4.5 \pm 0.2 \times 10^6$ | $148 \pm 8$  |
| 4.3 | 5.4 | $5.1 \pm 0.4 \times 10^6$ | $125 \pm 12$ |

**Table S3)** Hyperfine parameters determined from fits to the Mössbauer spectra.  $\Gamma$ (FWHM) =  $0.22 \pm 0.01$  mm/s (relative to  $\Gamma_{\text{nat}} = 0.133 \pm 0.002$  mm/s for the source) that reflects an amount of chemical and structural disorder about the Fe-sites typical to nanoparticles.  $\delta$  (mm/s) is the (chemical) isomer shift,  $\Delta$  (mm/s) is the quadrupole shift (quadrupole splitting), and  $B_{\text{hf}}$  the hyperfine field.

| Fe species in nanoparticle                                                   | $\delta$ (mm/s)   | $\Delta$ (mm/s)  | $B_{\text{hf}}$ (T) |
|------------------------------------------------------------------------------|-------------------|------------------|---------------------|
| Fe <sub>3</sub> O <sub>4</sub> tetrahedral Fe <sup>2+</sup> A-site           | $0.483 \pm 0.002$ | 0                | $49.96 \pm 0.07$    |
| Fe <sub>3</sub> O <sub>4</sub> octahedral Fe <sup>3+/2+</sup> B-site         | $0.595 \pm 0.005$ | 0                | $53.67 \pm 0.09$    |
| $\gamma$ -Fe <sub>2</sub> O <sub>3</sub> Tetrahedral Fe <sup>3+</sup> A-site | $0.403 \pm 0.009$ | $0.56 \pm 0.06$  | $50.12 \pm 0.03$    |
| $\gamma$ -Fe <sub>2</sub> O <sub>3</sub> Octahedral Fe <sup>3+</sup> B-site  | $0.572 \pm 0.003$ | $-0.36 \pm 0.03$ | $53.74 \pm 0.02$    |
| orthosilicate: Fe <sup>2.5+</sup>                                            | $0.403 \pm 0.009$ | $-0.03 \pm 0.02$ | $51.72 \pm 0.05$    |

**Figure S1a)** Reitveld refined<sup>[1]</sup> x-ray diffraction pattern of the nanoparticles with a 4.6 nm diameter Fe-oxide core and 3.6 nm thick silica shell. The black line is the refinement, and the blue represents the residuals. Bragg markers identify the reflections for the spinel structure Fd-3m space group, with  $a=b=c=0.8359(5)$  nm. Occupancies of the Fe  $8a$  and  $16d$  sites were fixed

at 1/8 and 1/2.<sup>[2]</sup> The broad, diffuse reflection below 18 degrees 2-theta is consistent with an amorphous silica shell.<sup>[3]</sup>

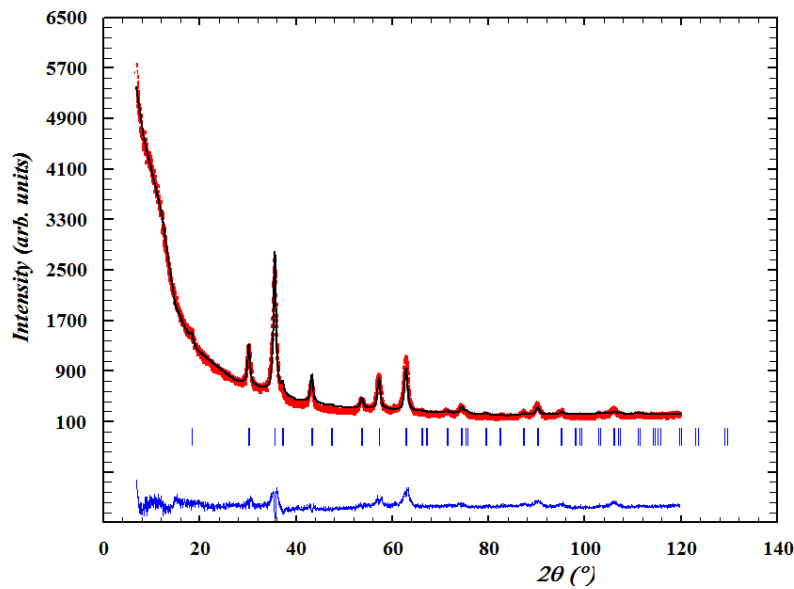

**Figure S1b)** Reitveld refined<sup>[1]</sup> x-ray diffraction pattern of the nanoparticles with a 4.9 nm diameter Fe-oxide core and 4.6 nm thick silica shell. The black line is the refinement, and the blue represents the residuals. Blue Bragg markers identify the reflections for the spinel structure  $Fd\text{-}3m$  space group, with  $a=b=c=0.8370(2)$  nm. Occupancies of the Fe  $8a$  and  $16d$  sites were fixed at 1/8 and 1/2.<sup>[2]</sup> Red Bragg markers incorporate an orthosilicate phase ( $\text{Fe}_2[\text{SiO}_4]$ ) with reflections for the  $Fd\text{-}3m$  space group,  $a=b=c=0.8294(1)$  nm, and site occupancies for the Fe fixed at 1/8 and 1/2 for the  $M=0.989 \text{ Fe}+0.011 \text{ Si}$  and  $T=0.977 \text{ Si} + 0.023 \text{ Fe}$   $16d$  and  $8a$  sites, respectively.<sup>[2]</sup>

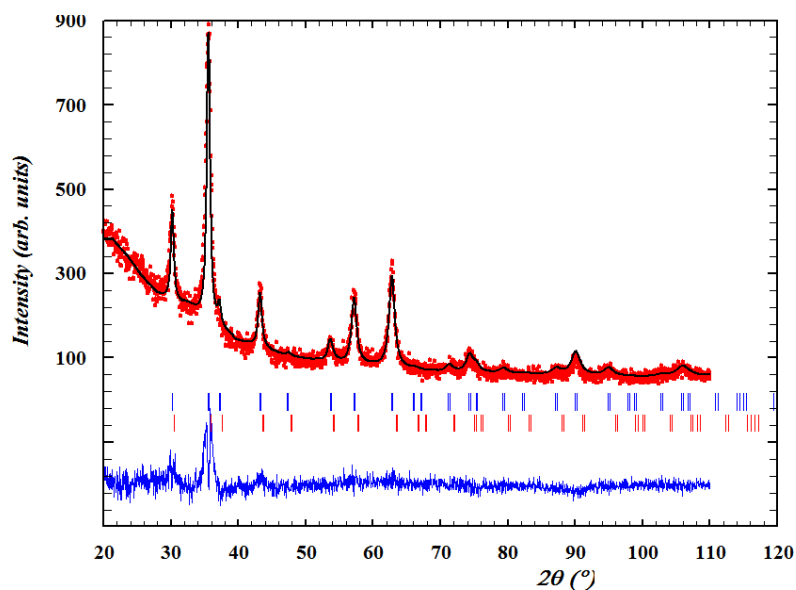

**Figure S1c)** Reitveld refined<sup>[1]</sup> x-ray diffraction pattern of the nanoparticles with a 4.3 nm diameter Fe-oxide core and 4.4 nm thick silica shell. The black line is the refinement, and the blue represents the residuals. Bragg markers identify the reflections for the spinel structure Fd-3m space group, with  $a=b=c=0.8363(3)$  nm. Occupancies of the Fe  $8a$  and  $16d$  sites were fixed at 1/8 and 1/2.<sup>[2]</sup> The broad, diffuse reflection below 18 degrees 2-theta is consistent with an amorphous silica shell.<sup>[3]</sup>

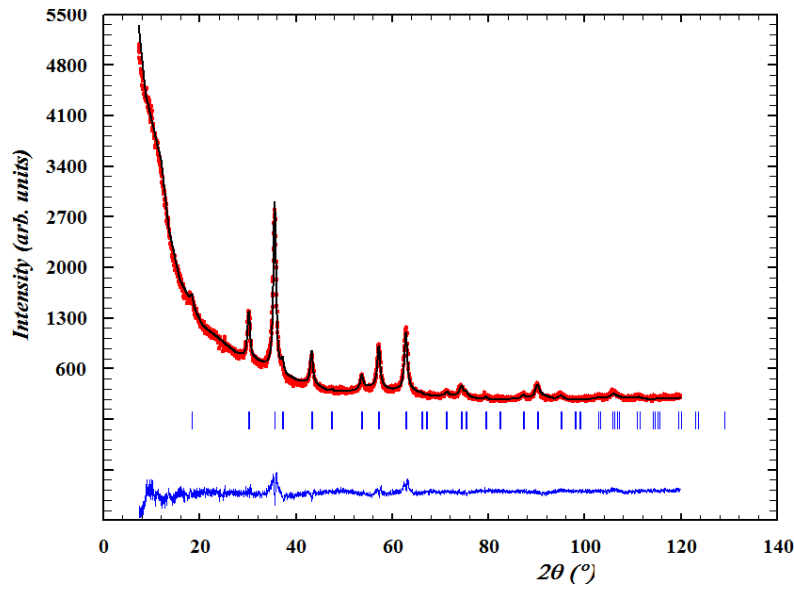

**Figure S2) Left:** Temperature dependence of the zero-field-cooled (ZFC) and field-cooled (FC) 100 Oe magnetization ( $M$ ) for the Fe-oxide/SiO<sub>2</sub> core/shell nanoparticles and the nanocomposite. The increasing broadening of  $M_{ZFC}(T)$  is an indication of increasing interparticle interaction strength between systems. The divergence of  $M_{ZFC}(T)$  and  $M_{FC}(T)$  marks the superparamagnetic blocking temperature of the system. **Right:** Difference between the FC and ZFC magnetizations ( $\Delta M = M_{FC} - M_{ZFC}$ ) as a function of temperature to more easily observe the identical  $T_B$ s between the as-prepared nanoparticle power systems despite increasing SiO<sub>2</sub> shell thickness (that should decrease the interparticle interactions).

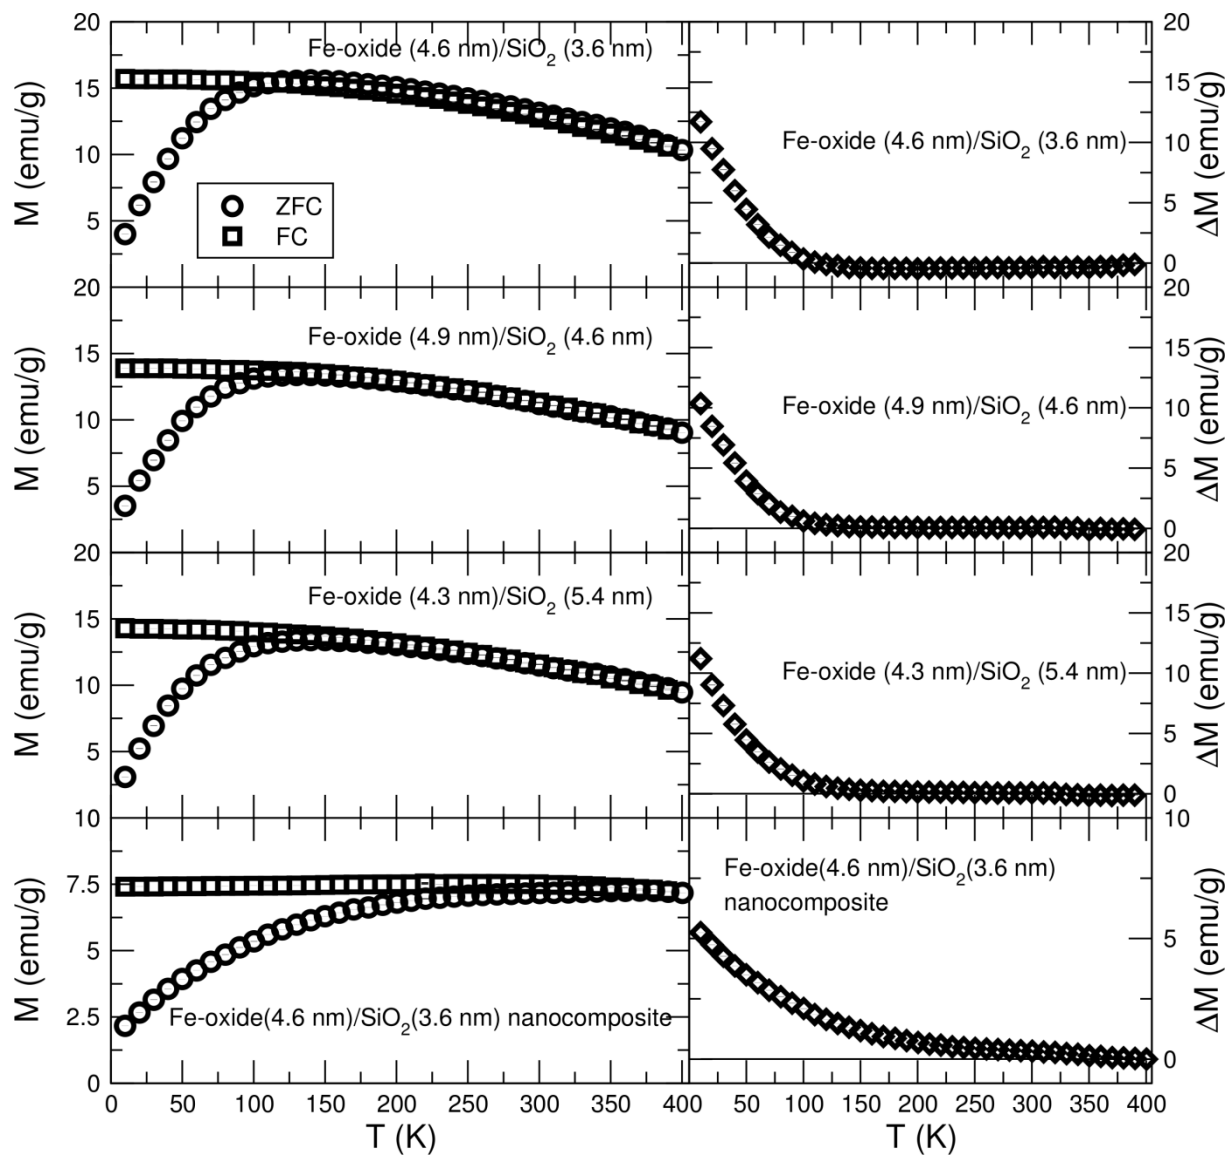

**Figure S4)** Inverse blocking temperature ( $1/T_B$ ) determined from  $\chi'_{AC}(T)$  scans as a function of the natural logarithm of the measuring frequency,  $\nu_m$ , for the three as-prepared Fe-oxide/SiO<sub>2</sub> core/shell nanoparticle systems. The dashed lines represent a fit with the Néel-Brown model that yields unphysically large  $K$  ( $2\text{--}3 \times 10^7$  erg/cm<sup>3</sup>) and attempt frequency,  $\nu_0$  ( $10^{20}$  Hz, frequencies much larger than the Larmour precession frequency of the atoms) values. The solid lines are a fits to the Vogel-Fulcher model that describe the slight curvature of  $\ln(\nu_m)$  vs  $1/T_B$  and provide reasonable  $K$ ,  $\nu_0$  and  $T_0$  values (see text).

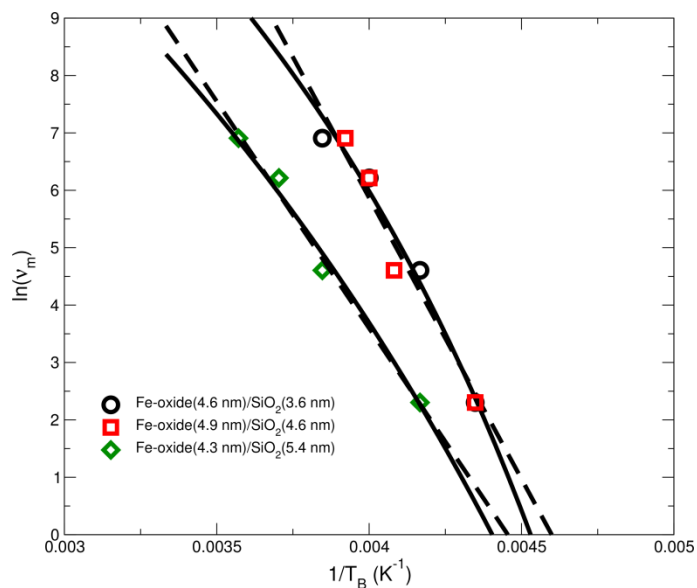



Supporting Information References:

- \_ [1] J. Rodriguez-Carvajal, Physica B, 25, 192 (1993)
- \_ [2] P. Villars, K. Cenzual, Pearson's Crystal Data: Crystal Structure Database for Inorganic Compounds (on DVD), Release 2011/12, ASM International®, Materials Park, Ohio, USA
- \_ [3] W. Vogel, S. Botti, S. martelli and E. Carlino, New J. Chem., 749 (1998)
